# Supplementary material for: In silico Screening of Plectranthus ampoinicus and Hyptis suaveolens Phytochemicals: Novel Repellents Targeting Odorant Binding Proteins of Aedes aegypti and Aedes albopictus
Source: Research Square preprint supplement (doi:10.21203/rs.3.rs-3578471/v1), 2023-11-14
Supplement: Supplementary file 1 [file 30daf23e34bcf6773df3f208.docx]

**Table 1.** Structure and properties of phytochemical compounds of *Hyptis suaveolens* and *Plectranthus ampoinicus* (ligand compounds) retrieved from PubChem database (<https://pubchem.ncbi.nlm.nih.gov/>).

| **S. No.** | **Plant source** | **Compound Structure** | **Compound name and ID** | **Molecular formula** | **Molecular weight (g/mol)** |
| --- | --- | --- | --- | --- | --- |
| 1. | *Hyptis suaveolens* | 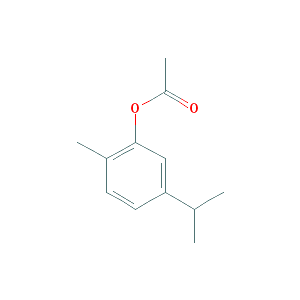 | Carvacryl acetate  (80792) | C12H16O2 | 192.25 |
| 2. | *H. suaveolens* | 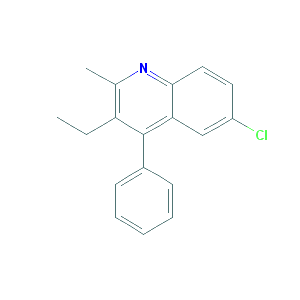 | 6-Chloro-3-ethyl-2-methyl-4-phenylquinoline  (624600) | C18H16ClN | 281.8 |
| 3. | *H. suaveolens* | 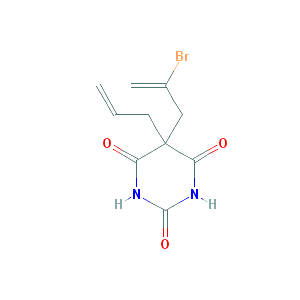 | Brallobarbital  (68416) | C10H11BrN2O3 | 287.11 |
| 4. | *H. suaveolens* | 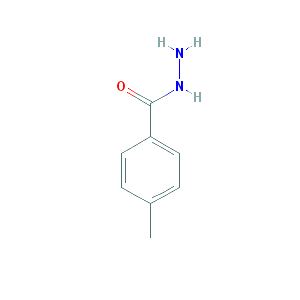 | 4-methylbenzohydrazide (77174) | C8H10N2O | 150.18 |
| 5. | *H. suaveolens* | 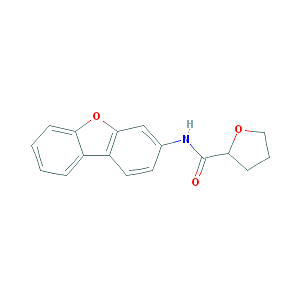 | N-dibenzofuran-3-yloxolane-2-carboxamide (4916597) | C17H15NO3 | 281.3 |
| 6. | *H. suaveolens* | 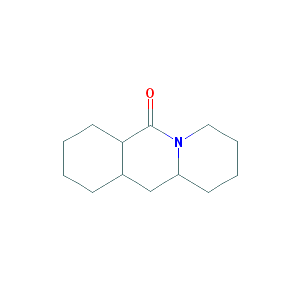 | Dodecahydropyrido [1,2-b] isoquinolin-6-one (610048) | C13H21NO | 207.31 |
| 7. | *H. suaveolens* | 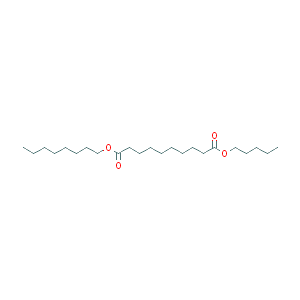 | Sebacic acid, octyl pentyl ester (91729267) | C23H44O4 | 384.6 |
| 8. | *H. suaveolens* | 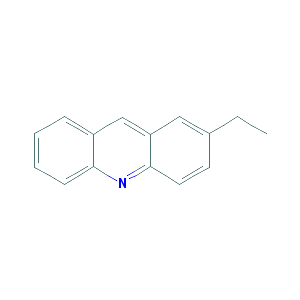 | 2-Ethylacridine (610161) | C15H13N | 207.27 |
| 9. | *H. suaveolens* | 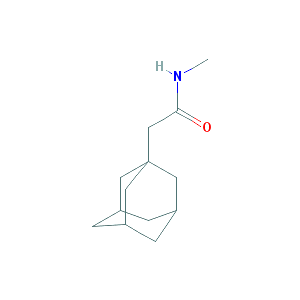 | N-Methyl-1-adamantaneacetamide (610088) | C13H21NO | 207.31 |
| 10. | *H. suaveolens* | 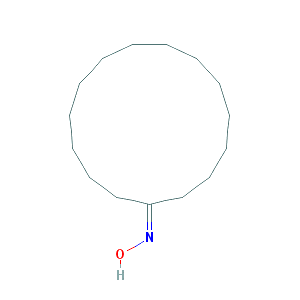 | Cyclopentadecanone Oxime (551985) | C15H29NO | 239.4 |
| 11. | *H. suaveolens* | 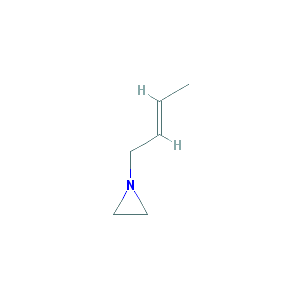 | 1-[(E)-but-2-enyl] aziridine (5362969) | C6H11N | 97.16 |
| 12. | *H. suaveolens* | 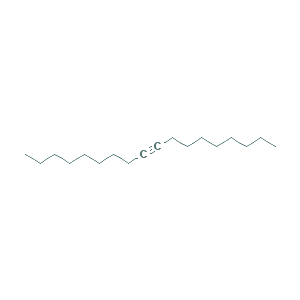 | 9-Octadecyne (141998) | C18H34 | 250.5 |
| 13. | *H. suaveolens* | 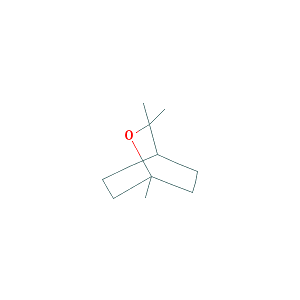 | Eucalyptol (2758) | C10H18O | 154.25 |
| 14. | *H. suaveolens* | 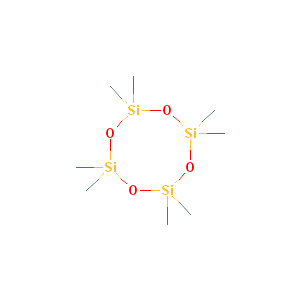 | Cyclotetrasiloxane, octamethyl-  (11169) | C8H24O4Si4 | 296.61 |
| 15. | *Plectranthus ampoinicus* | 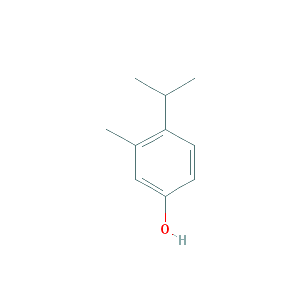 | 3-Methyl-4-isopropylphenol  (18597) | C10H14O | 150.22 |
| 16. | *P. ampoinicus* | 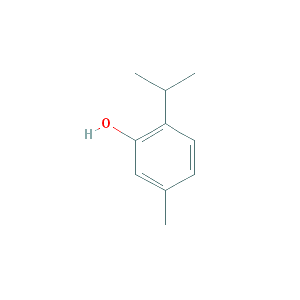 | Thymol (6989) | C10H14O | 150.22 |
| 17. | *P. ampoinicus* | 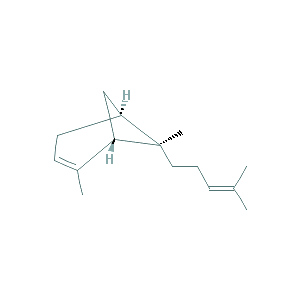 | Trans-alpha-Bergamotene  (6429302) | C15H24 | 204.35 |
| 18. | *P. ampoinicus* | 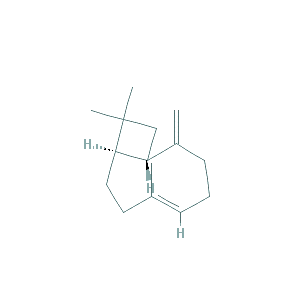 | Caryophyllene (5281515) | C15H24 | 204.35 |
